# Supplementary material
Source: publisher figshare collection journal article supplement (https://acs.figshare.com/ndownloader/files/4554160)

## Supporting information

**Title of manuscript:** Site-specific glycoprofiling of *N*-linked glycopeptides using MALDI-TOF MS: strong correlation between signal strength and glycoform quantities

**Authors:** Morten Thaysen-Andersen, Simon Mysling and Peter Højrup.

**Affiliation:** Department of Biochemistry and Molecular Biology, University of Southern Denmark, Campusvej 55, Odense M, DK-5230, Denmark

**Contents**      **Figure S1:** MALDI-TOF MS vs ESI-LTQ MS

**Figure S2:** GELoader tips and column length vs volume

## Legends for supporting figures

### Figure S1

**A)** Relative abundances of RNase B glycoforms determined using different ionization techniques (MALDI-TOF MS and ESI-LTQ MS) of various products (free glycans, glycopeptides, and intact protein) (see insert for color coding). Data from five replicates were averaged and standard deviations are shown. These profiles were all recorded in positive ionization mode. The data were compared to a reference profile (black outline). For simplicity no standard deviations are shown for the reference profile. Examples of glycoprofiling of intact RNase B using **B)** ESI-LTQ MS and **C)** MALDI-TOF MS are presented.

### Figure S2

GELoader tip micro-columns and the standard curve used to determine the chromatographic bead volume as a function of column length. **A)** HILIC (left) and graphite (right) micro-column in Eppendorf GELoader Tips. HILIC columns were constricted 1 mm from the tip to retain the column material. For graphite columns, a C<sub>18</sub> plug was used as an alternative to constricting the tip to allow uniform packing of the larger and heterogeneous-sized graphite particles. **B)** Standard curve relating the length of a micro-column to the volume, when measured 1 mm from the tip. For graphite column volume determination, the volume from the plug to the tip was determined and subtracted from total graphite column volume. Standard deviations were determined from n=5 measurements of column volume using water.

Figure S1

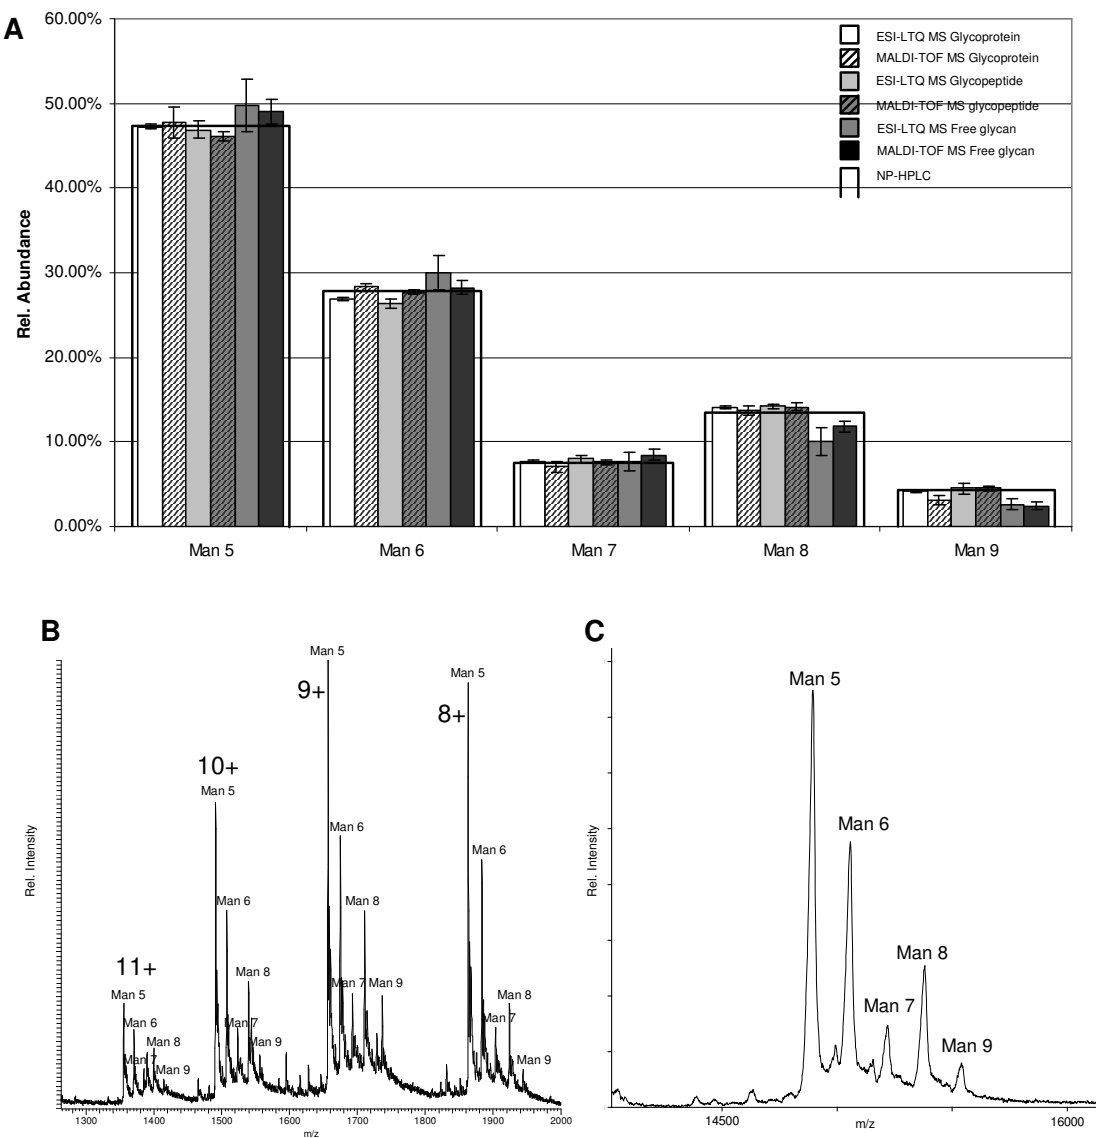

**Figure S2**

**A. Micro-columns**

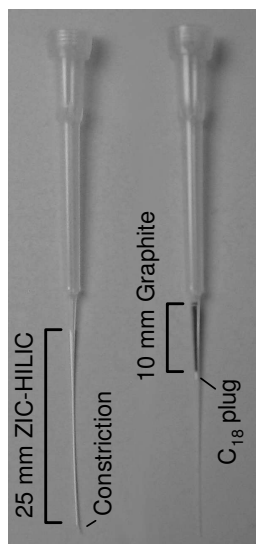

**B. Standard curve (column length vs volume)**

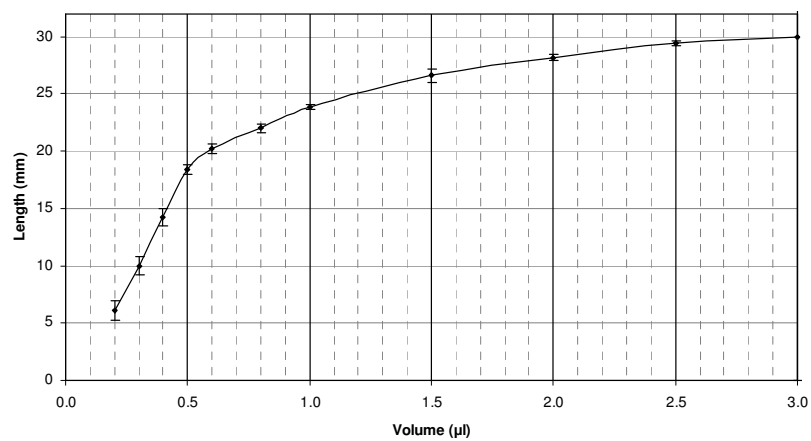

Supplement: Supplementary file 1 [file 4554160]
